# Supplementary material
Source: PubMed Central journal article supplement (PMC5038062)
Supplement: IAI.00437-16_zii999091838so2.pdf [file IAI.00437-16_zii999091838so2.pdf]

**Table S1: Strain table**

| <b>Name</b>                        | <b>Lab Ref #</b> | <b>Phenotype</b>                                                               | <b>Reference</b> |
|------------------------------------|------------------|--------------------------------------------------------------------------------|------------------|
| FRD1                               | DH2352           | Mucoid                                                                         | (1)              |
| FRD1 $\Delta$ <i>algU</i> (FRD440) | DH2353           | Non-mucoid derivative of FRD1;<br>Note: <i>algU</i> was formerly <i>algT</i> . | (2)              |
| CI224_nm                           | DH2243           | Non-mucoid isolate from same sample as CI224_M                                 | This study       |
| CI224_M                            | DH2241           | Mucoid                                                                         | This study       |
| CI227                              | DH227            | Non-mucoid                                                                     | This study       |
| CI228                              | DH228            | Mucoid                                                                         | This study       |
| CFRL8_1                            | DH2529           | Mucoid                                                                         | This study       |
| CFRL8_2                            | DH2530           | Mucoid                                                                         | This study       |
| CFRL11_1                           | DH2531           | LasR- (PYO-, HHQ overproducer)                                                 | This study       |
| CFRL11_2                           | DH2532           | LasR- (PYO-, HHQ overproducer)                                                 | This study       |
| PAO1                               | DH1856           | Wild type                                                                      | (3)              |
| PAO1 $\Delta$ <i>lasR</i>          | DH2400           | PAO1 <i>lasR</i> :Tc                                                           | (4)              |
| PA14                               | DH122            | Wild type                                                                      | (5)              |
| PA14 $\Delta$ <i>lasR</i>          | DH164            | In-frame deletion of <i>lasR</i>                                               | (6)              |
| AMT0047-3                          | DH1132           | LasR- CF clinical isolate with substitution in <i>lasR</i> resulting in STOP   | (7)              |
| AMT0047-2                          | DH1133           | Parent of AMT0047-3                                                            | (7)              |
| NC-AMT0101-1                       | DH2417           | CF clinical isolate with frame-shift mutation in <i>lasR</i>                   | (7)              |
| NC-AMT0101-2                       | DH2415           | CF clinical isolate. Parent of NC-AMT0101-1                                    | (7)              |

1. **Ohman DE, Chakrabarty AM.** 1981. Genetic mapping of chromosomal determinants for the production of the exopolysaccharide alginate in a *Pseudomonas aeruginosa* cystic fibrosis isolate. *Infect Immun* **33**:142-148.
2. **Flynn JL, Ohman DE.** 1988. Cloning of genes from mucoid *Pseudomonas aeruginosa* which control spontaneous conversion to the alginate production phenotype. *J Bacteriol* **170**:1452-1460.
3. **Holloway BW, Escudra MD, Morgan AF, Saffery R, Krishnapillai V.** 1992. The new approaches to whole genome analysis of bacteria. *FEMS Microbiol Lett* **100**:101-105.

4. **Hammond JH, Dolben EF, Smith TJ, Bhujji S, Hogan DA.** 2015. Links between Anr and quorum sensing in *Pseudomonas aeruginosa* biofilms. *J Bacteriol* **197**:2810-2820.
5. **Rahme LG, Stevens EJ, Wolfort SF, Shao J, Tompkins RG, Ausubel FM.** 1995. Common virulence factors for bacterial pathogenicity in plants and animals. *Science* **268**:1899-1902.
6. **Cugini C, Morales DK, Hogan DA.** 2010. *Candida albicans*-produced farnesol stimulates *Pseudomonas* quinolone signal production in LasR-defective *Pseudomonas aeruginosa* strains. *Microbiology* **156**:3096-3107.
7. **Smith EE, Buckley DG, Wu Z, Saenphimmachak C, Hoffman LR, D'Argenio DA, Miller SI, Ramsey BW, Speert DP, Moskowitz SM, Burns JL, Kaul R, Olson MV.** 2006. Genetic adaptation by *Pseudomonas aeruginosa* to the airways of cystic fibrosis patients. *Proc Natl Acad Sci U S A* **103**:8487-8492.
